# Supplementary material for: The Arabidopsis Rho of Plants GTPase ROP1 Is a Potential Calcium-Dependent Protein Kinase (CDPK) Substrate
Source: MDPI journal article supplement (doi:10.3390/plants10102053), 2021-09-29
Supplement: s1 [file s1]

## Supplementary Table S2. PCR primers used in the study

### AtROP1 cloning:

>5' AtR1 NdeI  
ATACATATGAGCGCTTCGAGGTTTCGTAAA  
>AtRop1-SalI(lm) Rev  
GCAGTCGACTCATAGAATGGATCCTGCCTTCTG  
>AtROP1S97A BamHI Rev  
CGGGATCCACTTTTTGGCGACGTTTTCATAAC  
>AtROP1S97E BamHI Rev  
CGGGATCCACTTTTTCTCGACGTTTTCATAACTGG  
>AtRop1 Fw (SalI + 2ncl)  
GCAGTCGACATATGAGCGCTTCGAGGT  
>AtROP1 Rev (KpnI)  
GCAGGTACCTCATAGAATGGAGCATGC

### AtCPK17/34 cloning:

CPK17 NdeI Fw  
TCCATATGGGAAATTGTTGCTCTC  
CPK17 NotI Rev  
TTGCGGCCGCTTTGAATGAAAGTTCACG  
CPK34 NdeI Fw  
TCCATATGGGAAATTGTTGCTC  
CPK34 NotI Rev  
TTGCGGCCGCTTTGAATGATAGTTCACGC

### AtGEF2 cloning:

GEF2 EcoRI Fw  
CCGAATTCATGGAGAATTTGCCAAATC  
GEF2 XhoI Rev  
CCCTCGAGTTCTTCTCCTCTCATTGTTTTGTC

### AtRIC2 cloning:

RIC2 EcoRI Fw  
GGGAATTCATGGACAGAAACGGTGC  
RIC2 XhoI Rev  
GGCTCGAGGACGACGGTGCCGGTGAG
